**Title:** Control of lung ventilation following overwintering conditions in bullfrogs,  
*Lithobates catesbeianus*

**Authors:** \*Joseph M. Santin<sup>1,2</sup> & Lynn K. Hartzler<sup>1</sup>

**Affiliations:** <sup>1</sup> Wright State University, Department of Biological Sciences, 3640 Colonel Glenn. Hwy. Dayton, OH 45435. <sup>2</sup> Wright State University, Biomedical Sciences PhD Program, 3640 Colonel Glenn. Hwy. Dayton, OH 45435

**Corresponding author\* email:** Joseph M. Santin, [santin.2@wright.edu](mailto:santin.2@wright.edu)

**Keywords:** temperature acclimation, control of breathing, bullfrog, environmental physiology, hypercarbia, hypoxia

**Summary Statement:**

Following ventilatory inactivity during winter-submergence, bullfrogs can match breathing to metabolism and increase ventilation during hypoxia, but have reduced responses to hypercarbia, when acutely transitioned to a warm-terrestrial environment.

**Abstract:**

Ranid frogs in northern latitudes survive winter at cold temperatures in aquatic habitats often completely covered by ice. Cold-submerged frogs survive aerobically for several months relying exclusively on cutaneous gas exchange while maintaining temperature-specific acid-base balance. Depending on the overwintering hibernaculum, frogs in northern latitudes could spend several months without access to air, need to breathe, or chemosensory drive to use neuromuscular processes that regulate and enable pulmonary ventilation. Therefore, we performed experiments to determine whether aspects of the respiratory control system of bullfrogs, *Lithobates catesbeianus*, are maintained or suppressed following minimal use of air breathing in overwintering environments. Based on the necessity for control of lung ventilation in early spring, we hypothesized that critical components of the respiratory control system of bullfrogs would be functional following simulated overwintering. We found that bullfrogs recently removed from simulated overwintering environments exhibited similar resting ventilation when assessed at 24°C compared to warm-acclimated control bullfrogs. Additionally, ventilation met resting metabolic and, presumably, acid-base regulation requirements, indicating preservation of basal respiratory function despite prolonged disuse in the cold. Recently emerged bullfrogs underwent similar increases in ventilation during acute oxygen lack (aerial hypoxia) compared to warm-acclimated frogs; however, CO<sub>2</sub>-related hyperventilation was significantly blunted following overwintering. Overcoming challenges to gas exchange during overwintering have garnered attention in ectothermic vertebrates, but this study uncovers robust and labile aspects of the respiratory control system at a time point correlating with early spring following minimal/no use of lung breathing in cold-aquatic overwintering habitats.

## Introduction:

Anuran amphibians and other ectothermic vertebrates operate over a wide range of body temperatures that depend on time of day, microhabitat, local weather, and season. Ranid frogs living in northern latitudes (e.g., bullfrogs, common frogs, leopard frogs) survive cold winters in aquatic habitats that may be completely covered by ice (Emery et al., 1972; Willis et al., 1956). The respiratory and energetic challenges associated with overwintering submergence in frogs including complete reliance on cutaneous gas exchange, exercise capacity, acid-base balance, hypoxia tolerance, and induction of metabolic suppression are well understood (Donohoe et al., 1998; Donohoe et al., 2000; St-Pierre et al., 2000; Tattersall and Boutilier, 1997; Tattersall and Boutilier, 1999a; Tattersall and Boutilier, 1999b; Tattersall and Ultsch, 2008; West et al., 2006).

Unlike most other vertebrates, overwintering frogs and some turtles do not require lung ventilation for gas exchange due to their low metabolic rates and high capacity for extrapulmonary gas exchange (reviewed by Milsom and Jackson, 2011). Thus cold-submerged ranid frogs remain aerobic for >5 months in oxygenated water while maintaining temperature-specific acid-base balance (Ultsch et al., 2004). CO<sub>2</sub> and O<sub>2</sub> chemosensory processes that typically stimulate breathing do not function at temperatures  $\leq 10\text{-}15^{\circ}\text{C}$  (Bicego-Nahas and Branco, 1999; Bicego-Nahas et al., 2001; Morales and Hedrick, 2002; Santin et al., 2013). Therefore, depending on the overwintering hibernaculum, frogs from northern latitudes could potentially spend several months without access to air, need for lung breathing, and chemosensory drive to use pulmonary ventilation. Rising ambient temperature typically triggers emergence from overwintering hibernacula (Willis et al., 1956). Warming of body temperature and accomplishing energetically costly behaviors (e.g., calling, foraging,

mating) in early spring (Tattersall and Ultsch, 2008; Willis et al., 1956) undoubtedly increase rates of O<sub>2</sub> consumption and CO<sub>2</sub> production above that provided by cutaneous gas exchange (Gottlieb and Jackson, 1976; Jackson and Braun, 1979; Mackenzie and Jackson, 1978). Despite minimal use of lung breathing during aquatic overwintering, frogs emerging in the spring should quickly require lung ventilation to sustain adequate gas exchange.

Air breathing vertebrates, including frogs, regulate ventilation through a complicated sensorimotor system (Feldman et al., 2013; Kinkead, 2009). Although extreme exceptions exist, prolonged disuse of and reduced sensory input to other neural-muscular systems may contribute to decreased function. For example, 24 hours of mechanical ventilation leads to decreased force production in the diaphragm of rats (Powers et al., 2002). Following hibernation, European ground squirrels do not retain spatial and operant memories learned in fall (Millesi et al., 2001). Pharmacological silencing of neurons in culture leads to a reduction in functional synaptic connections (Mitra et al., 2012). Moreover, simulated overwintering in ranid frogs decreases jump performance when assessed at warm, spring-like temperatures (Renaud and Stevens, 1983). It remains unknown how well frogs match ventilation to metabolism and combat disturbances to blood gas homeostasis upon acute transition from a cold-submerged hibernaculum to a warm-terrestrial habitat as occurs after emergence from overwintering without lung breathing and chemosensory control of ventilation.

Here we determined the consequences of cold-acclimation on respiratory control of intact bullfrogs, *Lithobates catesbeianus*, 14-16 hr following forced emergence and warming from simulated overwintering hibernacula. This allowed us to establish how well the breathing control system works after prolonged absence of

(cold-acclimated at 2°C without air access) or negligible (cold-acclimated at 2°C with air access) pulmonary ventilation. Soon after spring emergence from underwater habitats, frogs perform costly behaviors at higher temperatures that require control of pulmonary ventilation to sustain metabolic rates despite months of disuse. Thus, we hypothesized that bullfrogs can breathe to 1.) enable resting metabolic processes and 2.) combat challenges to blood gas homeostasis upon transition from a cold-submerged to a warm-terrestrial environment as occurs following emergence in early spring. To test these hypotheses we measured ventilation, metabolism, breathing pattern, hypercarbic, and hypoxic chemoreflexes at 24°C, after forced emergence from simulated overwintering environments in adult bullfrogs. This approach provided insights into aspects of the respiratory control system that diminish and remain intact following overwintering submergence with no reliance on air breathing.

## Materials and Methods

### *Experimental Animals*

Adult female bullfrogs, *Lithobates catesbeianus*, were purchased from Rana Ranch (Twin Falls, ID, USA) and maintained in the lab in three plastic tanks at ~22°C aerated water with access to wet and dry areas (n=8 animals per tank). The depth of the water was 17 cm in each tank. Frogs were exposed to 12:12-h light-dark cycles and fed crickets twice per week. Experiments were performed on control (warm-acclimated; 22°C) bullfrogs after at least two weeks of acclimation to conditions of the animal facility. Food was withheld for 3 days before experiments. To produce the cold-acclimated groups, after ~2 weeks of laboratory acclimation, two of the tanks were cooled in a walk-in environmental chamber at ~3-4°C per week over 6 weeks until a final temperature of ~2°C was reached. During the cooling period, the light:dark cycle was gradually transitioned from 12:12 to 10:14 to shorten the day length. During the cooling ramp, bullfrogs were fed twice per week; however, feeding stopped and frogs tended to voluntarily submerge when water temperature reached ~7°C. At this time food was withheld and access to dry areas were removed. At 6 weeks, a plastic screen containing small holes was placed near the surface of one of the tanks undergoing cold-acclimation to deny air access. Bullfrogs were then maintained for the next 6 weeks with or without access to air at ~2 °C. Following 6 weeks at 2°C with or without access to air, experiments were performed over the next three weeks. Experiments in cold-acclimated bullfrogs from tanks with and without access to air were alternated during the three-week experimental period. Experiments were approved by the Wright State University Institutional Animal Care and Use Committee.

We occasionally monitored the surfacing behavior of cold-acclimated bullfrogs that had access to air. Similar to previous reports (Lillo, 1980; Tattersall and Ultsch, 2008) bullfrogs spent most time voluntarily submerged and were only occasionally observed at the surface. Based on the lack of a requirement for pulmonary ventilation during cold-overwintering, we are confident that surfacing behavior and reliance on pulmonary ventilation were minimal in the group provided air access, but we did not quantify these parameters.

### *Measurement of Ventilation*

We measured ventilation in bullfrogs acclimated to room temperature (22°C; n=8), 2°C (air access; n=7), and 2°C (submerged; n=5) air groups at 24°C (a temperature requiring lung ventilation as would occur in spring) using air-flow pneumotachography (Glass et al., 1978) closely following methods that we recently adapted for bullfrogs (Santin and Hartzler, 2016). Briefly, the evening prior to measurements, bullfrogs were lightly anesthetized with ~0.5% (v/v) isoflurane until losing toe pinch and eye reflexes. A small, lightweight facemask created from the bulb of a 3 mL transfer pipette (Samco Scientific Corporation, Cat. No. 225-15, San Fernando, CA, USA) containing a small pneumotach was fitted to the snout of the frog using gel super glue (Loctite Super Glue Gel; Westlake, OH, USA). After the glue dried, the pneumotach was connected to a differential pressure transducer (TSD 160A differential pressure transducer Biopac Systems Inc., CA, USA) by PE50 tubing and the mask was carefully checked for leaks to ensure all air-flow produced by the animal moved across the pneumotach. Bullfrogs fitted with the mask and pneumotach were then placed in a dark 875 mL experimental chamber overnight at 24 °C and exposed to airflow of 1.1 L/min.

The only methodological difference between this study and Santin and Hartzler (2016) is that we omitted the use of sutures to secure the mask before applying super glue. This step was deemed unnecessary as the super glue alone held the mask in place and remained sealed in most animals. A comparison between 22°C acclimated animals with and without sutures to secure the mask revealed that all ventilation and metabolic parameters (frequency, tidal volume, minute ventilation, breathing pattern,  $\dot{V}_{O_2}$ ,  $\dot{V}_{CO_2}$ , and respiratory exchange ratio) were the same ( $p > 0.05$  for all parameters; two-tailed unpaired t test; Supplementary Table 1).

#### *Measurement of Metabolic Rate*

The rates of O<sub>2</sub> consumption ( $\dot{V}_{O_2}$ ) and CO<sub>2</sub> production ( $\dot{V}_{CO_2}$ ) were determined in concert with ventilation as described in Santin and Hartzler (2016). Open-flow respirometry was performed by pushing experimental gas mixtures at 1.1 ml/min through a flask half-filled with water to fully humidify the gas. Subsamples of humidified gases were then pulled through the sealed acrylic chamber (875 mL) containing the animal at 215 mL/min by a suction pump (AEI Technologies Inc., PA, USA). Gases were pulled through a 4100 series mass flow meter (TSI Inc., MN, USA), a CO<sub>2</sub> analyzer (CD-3A; AEI Technologies Inc., PA, USA), a 10 mL syringe filled with desiccant (DM-AR; Perma pure LLC, NJ, USA), and finally an infrared O<sub>2</sub> analyzer (S-3A/I; AEI Technologies Inc., PA, USA).

#### *Experimental Protocols*

All experiments were performed during the light cycle. After ~16 hrs following attachment of the mask and pneumotach, resting ventilation and metabolism was



determined when pulling room air through the sealed chamber at 215 mL/min. Each animal was exposed to both hypercarbia and hypoxia for 30 min, in a random order with 2-3 hours between each stimulus. This was a long enough time period for recovery from the previous stimulus (Santin and Hartzler, 2016) and we did not observe an order effect (*i.e.*, exposure to hypercarbia did not influence the hypoxic ventilatory response and *vice versa*; personal observation). When switching from room air to either experimental gas mixture or experimental gas mixture back to room air, we pushed the humidified gas through the chamber at 1.1 mL/min for 5 minutes to reduce the time required to exchange the gaseous environment. Fractional concentrations of incurrent gases were checked before each gas transition to minimize errors due to drift of gas analyzers. We observed that flow changes in the chamber do not influence ventilation and given that most measurements were taken at steady-state this does not likely present a problem. The only time point where ventilation measurements were made immediately after altering the flow was the post-hypercarbic period. It is unlikely that changes in flow influence the increase in breathing observed in the post hypercarbic period (1-2 minutes after hypercarbia) since breathing frequency in the “post-hypoxic” period does not increase (Santin and Hartzler, 2016) (personal observation; data not included). At the end of each experiment, the facemask was removed and 0.1-1.2 mL air injections were pushed through the facemask to calibrate the pneumotach.

### *Data Analysis*

Resting ventilation, breathing pattern, and metabolism were determined in room air for 30 minutes before switching to the experimental gases in each animal group. During hypercarbia and hypoxia, ventilation was measured for 5 minutes,

every 10 minutes, to elucidate the time course of the ventilatory response. Additionally, ventilation in the 1 minute period after hypercarbia (post-hypercarbia) was analyzed as this ventilatory response represents the “stimulatory” ventilatory response to CO<sub>2</sub> independent of olfactory inhibition (Kinkead and Milsom, 1996) and is less variable between animals (Santin and Hartzler, 2016) presumably because of variable activation of inhibitory olfactory responses.  $\dot{V}_{O_2}$  and breathing pattern were measured in the last 5 min. of hypoxia and hypercarbia.

Lung breaths were identified by their large amplitude relative to buccal ventilations and biphasic expiratory flow pattern (Jones, 1982; Vitalis and Shelton, 1990). We integrated the expiratory flow signal caused by lung breaths and interpolated differential pressure integrals into the calibration curve for each animal to establish tidal volume ( $V_T$ ) and then converted  $V_T$  to standard temperature pressure dry (STPD). Ventilation ( $\dot{V}_E$ ) was determined by multiplying  $f$  by  $V_T$ . Breathing pattern characteristics including episode frequency, breaths per episode, instantaneous frequency, and duration of the non-ventilatory period were analyzed according to previously established criteria (Kinkead and Milsom, 1996).

$\dot{V}_{O_2}$  and  $\dot{V}_{CO_2}$  were determined by measuring the fractional differences between inspired and expired O<sub>2</sub> and expired and inspired CO<sub>2</sub>, respectively, multiplied by the flow rate, and expressed as STPD. The air convection requirement (ACR) was calculated by dividing  $\dot{V}_E$  by either  $\dot{V}_{O_2}$  or  $\dot{V}_{CO_2}$ . Since our experimental setup did not allow us to measure  $\dot{V}_{O_2}$  during the post-hypercarbic period, ACR for the post hypercarbic hyperpnea was estimated using the  $\dot{V}_{O_2}$  measurement taken during hypercarbia before switching to room air.

### *Statistics*

Data are presented as mean  $\pm$  S.E.M. Resting ventilation and metabolic parameters between experimental groups were analyzed using a one-way ANOVA. When assessing the influence of hypoxia or hypercarbia on ventilation, breathing pattern, and metabolism, main effects (temperature acclimation and gas) and interactions (temperature acclimation  $\times$  gas) on ventilation and metabolic parameters were analyzed using a repeated measures two-way ANOVA with time point in gas as the repeated measure. Some animals did not contain certain breathing pattern characteristics; therefore these could not be analyzed. For example, instantaneous breathing frequency could only be measured in 9/12 total cold-acclimated frogs during hypercarbia (1 cold frog with air access and 2 without access did not contain breaths occurring in succession during the sampling period). Since there were no statistical differences in absolute breathing frequency between acclimation groups and to ensure adequate sample sizes for pattern analysis, we pooled data from cold-acclimated tanks for these analyses and indicate the sample size for each analysis in the figure and legend. Because a repeated measures design could not be used when animals contained aspects of the breathing pattern in room air, but not hypercarbia/post hypercarbia, data were analyzed using an ordinary two-way ANOVA. Pairwise comparisons were performed using the Holm-Sidak multiple comparisons test. Statistical significance was accepted when  $p < 0.05$ . Pertinent statistical information is included in the results section.

## Results

### *Resting Ventilation and Metabolism following Cold-Acclimation*

Control, cold-acclimated with air access and cold-submerged bullfrogs weighed  $109\pm 9$  g,  $112\pm 12$  g, and  $102\pm 6$  g, respectively immediately following experiments. To understand the capacity for lung ventilation to match metabolism after emerging from an overwintering habitat, we measured ventilation and metabolism in cold-acclimated bullfrogs ~16 hours after transition from a cold-aquatic to a warm-terrestrial environment. Fig. 1 shows that cold-acclimation (with or without air access) does not influence breathing frequency ( $p=0.1636$ ;  $F_{(2,17)}=1.084$ ; one-way ANOVA), tidal volume ( $p=0.2137$ ;  $F_{(2,17)}=1.692$ ; one-way ANOVA) and minute ventilation ( $p=0.9185$ ; ;  $F_{(2,17)}=0.0854$ ); one-way ANOVA) at rest. Figure 2 shows metabolic parameters in the three acclimation groups. Resting  $\dot{V}_{O_2}$  was elevated in cold-acclimated bullfrogs that had access to air (Fig. 2A;  $p=0.0277$ ;  $F_{(2,18)}=4.404$ ; one-way ANOVA;  $p<0.05$  control vs. CA: Air;  $p>0.05$  for all other comparisons; Holm-Sidak's multiple comparisons test). However  $\dot{V}_{CO_2}$  (Fig. 2B;  $p=0.2109$ ;  $F_{(2,18)}=1.699$ ; one-way ANOVA); and the respiratory exchange ratio of each animal (RER;  $\dot{V}_{CO_2}/\dot{V}_{O_2}$ ) (Fig. 2C;  $p=0.3526$ ;  $F_{(2,18)}=1.488$ ; one-way ANOVA) were not different among control and both cold-acclimated groups.

The air convection requirement (ACR;  $\dot{V}_E/\dot{V}_{O_2}$  and  $\dot{V}_E/\dot{V}_{CO_2}$ ) normalizes ventilation to metabolic rate, and ACR can therefore be used to infer hyper- or hypoventilation between animal groups. For example, if one treatment (e.g., cold-acclimation) has a reduced ACR compared to control, we can infer that lung ventilation does not match metabolism after cold-acclimation and these animal are hypoventilating. Fig. 2D & 2E show that both air convection requirements for  $O_2$  acquisition ( $p=0.8039$ ;  $F_{(2,17)}=0.2211$ ; one-way ANOVA) and  $CO_2$  elimination

( $p=0.9218$ ;  $F_{(2,17)}=0.0917$ ; one-way ANOVA) are not different among warm-acclimated and both groups of cold-acclimated bullfrogs. Taken together, these results show that cold-acclimated bullfrogs match breathing to metabolism similarly to controls and have respiratory exchange ratios comparable to control bullfrogs at rest (*i.e.*, they use similar metabolic fuel and/or have a similar acid-base status). This suggests that baseline ventilation is well buffered against cold and disuse and is capable of supporting resting organismal metabolism after emergence despite near-complete to complete disuse of lung breathing.

#### *Cold-acclimation reduces the post-hypercarbic hyperpnea*

Aside from regulating gas exchange to sustain resting metabolism, the respiratory control system must respond to acid-base disturbances and elicit ventilatory compensation. To test responsiveness of the respiratory control system to acid-base perturbations, we exposed control and recently emerged bullfrogs to environmental hypercarbia (5% CO<sub>2</sub> in air). Fig. 3 shows  $\dot{V}_E$ , breathing frequency, and  $V_T$  in response to hypercarbia. During hypercarbia, all three groups did not change ventilation at any time point (Fig. 3A;  $p>0.05$  at each time point during hypercarbia; Holm-Sidak's multiple comparisons test). We recently showed that there is large variability in ventilatory responses during hypercarbia presumably due to animal-to-animal differences in CO<sub>2</sub>-sensitive olfactory inhibition. The post-hypercarbic hyperpnea (*i.e.*, ventilatory increase in the ~1 minute after removal of CO<sub>2</sub> from the airway when arterial CO<sub>2</sub> and pH remain elevated and reduced, respectively (Kinkead and Milsom, 1996)) was consistently large regardless of breathing during hypercarbia (Santin and Hartzler, 2016). Therefore, the post-hypercarbic hyperpnea has been suggested to represent a uniform index of

stimulatory CO<sub>2</sub> chemosensitivity in vertebrates with large inhibition of breathing by olfactory chemoreceptors (Milsom et al., 2004). We observed that control bullfrogs had a robust post-hypercarbic hyperpnea (main effect of CO<sub>2</sub>;  $p < 0.0001$ ;  $F_{(4,68)} = 12.31$ ; two-way ANOVA; baseline vs. post hypercarbia and 30 minutes in hypercarbia vs. post hypercarbia;  $p < 0.05$  for both analyses; Holm-Sidak's multiple comparisons test). However, ventilation did not undergo significant increases during or immediately following hypercarbia compared to normocarbia or hypercarbia in both groups of cold-acclimated bullfrogs ( $p > 0.05$ ; Holm-Sidak's multiple comparisons test). Additionally, ventilation in the post hypercarbic period was significantly less in cold-acclimated compared to warm-acclimated frogs ( $p < 0.05$ ; Holm-Sidak's multiple comparisons test). When expressing ventilation as a relative change, there was a significant interaction between temperature acclimation and CO<sub>2</sub> (Fig. 3B; CO<sub>2</sub> x temperature acclimation interaction;  $p = 0.0038$ ;  $F_{(8,68)} = 3.202$ ; two-way ANOVA), indicating that cold-acclimation alters the influence of CO<sub>2</sub> on ventilation through blunting the post-hypercarbic hyperpnea. The reduced ability to elicit ventilatory response to hypercarbia stemmed from a smaller increase in breathing frequency during post-hypercarbia (Fig. 3B; temperature acclimation x CO<sub>2</sub> interaction;  $p = 0.0001$ ;  $F_{(8,64)} = 4.784$ ; ). Unlike warm-acclimated bullfrogs, both groups of cold-acclimated frogs underwent small increases in  $V_T$  compared to baseline during or following hypercarbia (Fig. 3C; main effect of CO<sub>2</sub>;  $p = 0.0018$ ;  $F_{(4,68)} = 4.785$ ; cold-acclimated air at 30 min.  $p < 0.05$ ; Holm-Sidak's multiple comparisons test; cold-acclimated no air post hypercarbic hyperpnea;  $p < 0.05$ ; Holm-Sidak's multiple comparisons test), but these increases were not large enough to cause statistically significant increases in  $\dot{V}_E$ . These results imply that ventilatory response to CO<sub>2</sub> challenge is reduced following overwintering conditions.

To take into account the possibility of different metabolic responses to hypercarbia compared to warm and cold-acclimated bullfrogs, we also indirectly assessed metabolism using open-flow respirometry before and during hypercarbia then normalized ventilation to metabolism. This allowed us to determine whether CO<sub>2</sub> sensitivity of ventilation *per se* was reduced in cold-acclimated bullfrogs or changes in ventilation during CO<sub>2</sub> were the consequence of a different metabolic response to hypercarbia. Fig. 4A shows that  $\dot{V}_{O_2}$  was not influenced by hypercarbia and there were no differences among temperature acclimation groups ( $p > 0.05$ ; two-way ANOVA; no main effects or interactions). The air convection requirement ( $\dot{V}_E/\dot{V}_{O_2}$ ) was influenced by CO<sub>2</sub> treatment ( $p = 0.0056$ ;  $F_{(2,34)} = 6.601$ ; two-way ANOVA). ACR increased significantly during the post-hypercarbic hyperpnea in controls ( $p < 0.001$ ; Holm-Sidak's multiple comparisons test), but not in either group of cold-acclimated bullfrogs. ACR was also greater in control bullfrogs compared to both groups of cold-acclimated frogs ( $p < 0.05$ ; Holm-Sidak's multiple comparisons test). Thus, cold-acclimated frogs do not undergo hyperventilation during or following hypercarbia. These findings indicate that reduced ventilatory responses to hypercarbic-related stimulation results from reductions in ventilatory sensitivity to CO<sub>2</sub> challenge and not from changes in metabolic responsiveness to hypercarbia.

To assess possible causes of the reduction in CO<sub>2</sub> sensitivity of the breathing frequency, we analyzed aspects of the episodic breathing pattern that is characteristic of anuran amphibians. Fig. 5A & B show that post-hypercarbia resulted in addition of more breaths in each episode of warm-acclimated bullfrogs (Fig. 5A;  $p < 0.05$  control vs. post-hypercarbic hyperpnea; Holm-Sidak's multiple comparisons test) without changing the number of episodes per minute (Fig. 5B;  $p > 0.05$  control vs. post-hypercarbic hyperpnea; Holm-Sidak's multiple comparisons

test). Warm-acclimated, control bullfrogs also had shorter non-ventilatory periods in the post-hypercarbic period (Fig. 5D;  $p < 0.05$  control vs. post-hypercarbic hyperpnea; Holm-Sidak's multiple comparisons test). In contrast, cold-acclimated bullfrogs did not undergo significant increases in the number of breaths per episode and did not shorten the duration of the non-ventilatory period (Fig. 5B & D;  $p > 0.05$  control vs. post-hypercarbic hyperpnea; Holm-Sidak's multiple comparisons test). Additionally, instantaneous breathing frequency (the frequency of successive breaths during episodes of two or more breaths) was decreased in cold acclimated bullfrogs (main effect of temperature acclimation;  $p = 0.0004$ ;  $F_{(1,49)} = 14.38$ ; two-way ANOVA) and included a statistically significant difference in the post hypercarbic period compared to controls (Fig. 5C;  $p < 0.05$  control vs. cold-acclimated; Holm-Sidak's multiple comparisons test). Processes responsible for these changes are therefore insensitive to  $\text{CO}_2$  in cold-acclimated frogs.

#### *Cold-acclimation does not alter the ventilatory response to hypoxia*

To determine whether there was a global vs.  $\text{CO}_2$ -specific reduction in respiratory gas sensitivity, we also compared the ventilatory response to hypoxia (5%  $\text{O}_2$ ) in cold and warm-acclimated bullfrogs. In contrast to reductions in ventilatory responses to  $\text{CO}_2$  challenge, ventilatory responses to hypoxia were similar among control and both cold-acclimated groups. Warm and both cold-acclimated groups increased  $\dot{V}_E$  during hypoxia (Figure 6A; main effect of hypoxia;  $p < 0.0001$ ;  $F_{(4,68)} = 18.25$ ; two-way ANOVA;  $p > 0.05$  for all comparisons between acclimation groups; Holm-Sidak's multiple comparisons test). Increases in ventilation were caused by increases in  $V_T$  in each acclimation group (Figure 6B; main effect of hypoxia;  $p < 0.0001$ ;  $F_{(4,68)} = 16.72$ ; two-way ANOVA;  $p > 0.05$  for all



between acclimation group comparisons; Holm-Sidak's multiple comparisons test). Although we observed a significant effect of hypoxia on breathing frequency (two-way ANOVA; effect of hypoxia;  $F_{(3,51)}= 4.099$ ;  $p=0.0111$ ), there were no significant pairwise comparisons between different time points in hypoxia compared to normoxic breathing frequency in any acclimation group (Figure 6B;  $p>0.05$ ; Holm-Sidak's multiple comparisons test).

We also measured  $\dot{V}_{O_2}$  during hypoxia so that we could calculate changes in the air convection requirements among acclimation groups in response to hypoxia. This would allow us to determine whether similar ventilatory responses to hypoxia were occurring amid different metabolic responses to hypoxia among acclimation groups. Fig. 7A shows that acute hypoxia did not alter  $\dot{V}_{O_2}$  in any acclimation group (no effect of temperature acclimation or hypoxia;  $p>0.05$ ; two-way ANOVA). Given that ventilation increased in warm and both cold-acclimated groups,  $\dot{V}_E/\dot{V}_{O_2}$  increased significantly in response to hypoxia (main effect of hypoxia;  $p<0.0001$ ;  $F_{(1,17)}= 68.27$ ; two-way ANOVA;  $p>0.05$  for comparisons between acclimation groups), indicating ventilatory sensitivity to hypoxia is intact following cold-acclimation with or without access to the surface.

Lastly, we measured aspects of the breathing pattern in normoxia and hypoxia. Similar to previous reports in warm-acclimated bullfrogs (Santin and Hartzler, 2016), the instantaneous breathing frequency decreased in warm and cold-acclimated bullfrogs (Fig. 8C; main effect of hypoxia;  $p=0.0007$ ;  $F_{(1,17)}=16.97$ ; two-way ANOVA). The number of episodes per minute, breaths per episode, and the duration of the non-ventilatory period were unaltered by hypoxia and temperature acclimation ( $p>0.05$ ; two-way ANOVA). Collectively, these results show that

bullfrogs that recently emerged from simulated overwintering hibernacula possess ventilatory responses to hypoxia.

## Discussion

We performed these experiments to determine whether aspects of the respiratory control system are maintained or suppressed following aquatic hibernation. Maintenance of the respiratory control system throughout extended disuse would ensure adequate gas exchange and blood gas homeostasis at higher temperatures following emergence from overwintering hibernacula. We found that bullfrogs recently removed from simulated overwintering environments exhibited similar levels of resting ventilation when assessed at 24°C compared to warm-acclimated bullfrogs. Additionally, ventilation matches resting metabolism and, presumably contributed to acid-base regulation requirements under control conditions, indicating preservation of basal respiratory function despite 6-9 weeks of minimal/no activity in the cold. Recently emerged bullfrogs underwent similar increases in ventilation during acute hypoxia, but not in response to hypercarbia-related stimulation, compared to warm-acclimated frogs. Altogether, this study reveals new insights into the function of the respiratory control system following extended disuse of lung breathing as inevitably occurs in cold-aquatic overwintering habitats of bullfrogs and other northern temperate frogs.

### *Respiratory Inactivity during Submergence*

Natural (hibernation, microgravity, bedrest) or experimental (limb immobilization) scenarios associated with neuromotor disuse in vertebrates generally lead to some degree of functional degradation through muscle atrophy or maladaptive neuroplastic changes (Clark et al., 2006; Hudson and Franklin, 2002; Langlet et al., 2012; Renaud and Stevens, 1983; Wickler et al., 1991). A notable and extreme exception, however, includes the green-striped burrowing frog who burrows

for ~9 months with no muscular atrophy (Hudson and Franklin, 2002). Although submerged northern temperature frogs such *L. catesbeianus* and *R. temperaria* move (Stinner et al., 1994; Tattersall and Boutilier, 1999b) and perform cardiovascular function (Lillo, 1980), lung breathing is suspended. Several lines of evidence suggest that the entire sensorimotor system controlling lung ventilation is inactive during the overwintering period. First, air access may be eliminated in overwintering hibernacula. Northern temperate frogs involuntary (*i.e.*, trapped under the ice) or voluntarily (*i.e.*, no need to surface) (Tattersal and Ultsch, 2008; personal observations) endure long periods of submergence ( $\geq 12$  hours to months). Second, low metabolic rates associated with cold temperatures can be satisfied exclusively through cutaneous gas exchange without negative consequences to temperature-specific blood gas homeostasis (Donohoe et al., 1998; Ultsch et al., 2004), eliminating a “need” to breathe. In fact, the isolated central respiratory control system of adult bullfrogs does not produce respiratory-related nerve activity below 10°C (Morales and Hedrick, 2002) suggesting that mechanism(s) may be in place to inhibit breathing under metabolic conditions that do not require lung ventilation. Third, anuran amphibians do not have chemical respiratory drive at low temperatures. Evidence across scales of organization indicate that CO<sub>2</sub> and O<sub>2</sub> sensory systems that alter ventilation for respiratory gas homeostasis do not detect chemosensory stimuli or drive breathing at cold temperatures (Bicego-Nahas and Branco, 1999; Morales and Hedrick, 2002; Rocha and Branco, 1998; Santin et al., 2013). Therefore, the system that generates, drives, and regulates lung ventilation, does not appear to function for several months during the winter.

We have made the argument here that bullfrogs contain a minimally active respiratory control system during overwintering conditions in deep, well-oxygenated

water. However, contradictory evidence exists suggesting that bullfrogs at 1°C will surface in shallow water (5 cm) when provided air access (Tattersal and Ultsch, 2008; unpublished observation). Although we did not quantify surfacing and lung ventilation in the group provided air access during simulated overwintering, we rarely observed frogs at the surface of the tank (personal observation). Given that both groups of cold-acclimated bullfrogs had similar levels of resting ventilation and ventilatory responses to gas challenges when assessed following forced emergence, we have no reason to believe that minimal surfacing that may have occurred in the group provided air access influenced breathing control compared with the submerged group. Therefore, we assume that bullfrogs with air access were “functionally submerged” with respect to changes that occurred to affect lung breathing after emergence.

#### *Maintenance of Resting Ventilation*

We found that cold-acclimation without or with (but minimally used) access to the surface did not affect the ability to generate lung ventilation (Fig. 1) and match ventilation to metabolism (Fig. 2) ~14-16 hours after warming from 2°C to 24°C. Measuring ventilation using facemask pneumotachography required us disturb the bullfrog to attach a mask to its face, precluding the use of an earlier time point in analysis. However, after removing bullfrogs from the cold environmental chamber before attaching the mask, we visually observed buccal pumping, naris opening and closing, and axial contraction associated with lung ventilation (Vitalis and Shelton, 1990) within a few minutes. Although we measured ventilation ~14-16 hours after emergence, this observation implies that basic neuromotor properties associated with breathing remain intact and do not require a recovery period. The strategies

used by bullfrogs that result in resilience of the respiratory output despite overwintering disuse are currently unknown. Cold-acclimated bullfrogs with air access had a slightly larger  $\dot{V}_{O_2}$  compared to control bullfrogs at 24°C (Fig. 2A), consistent with a classic temperature acclimation of metabolism of anurans (Feder, 1982). In contrast, submerged bullfrogs did not have greater  $\dot{V}_{O_2}$  at 24 °C compared to warm-acclimated frogs, perhaps due to metabolic suppression induced by forced submergence (*i.e.*, lower O<sub>2</sub> consumption during submergence than predicted by cold temperature alone) during overwintering conditions (Donohoe et al., 1998).  $\dot{V}_{CO_2}$  paralleled  $\dot{V}_{O_2}$  in both groups of cold-acclimated bullfrogs, but did not reach the same statistical significance. Regardless of these slight differences in metabolic backgrounds, ventilation evidently satisfied metabolism because average  $\dot{V}_E/\dot{V}_{O_2}$  and  $\dot{V}_E/\dot{V}_{CO_2}$  for individuals in each group (air convection requirement; ACR) were similar among each temperature acclimation group (Fig. 2D & E). We did not measure blood gases in this study; however, interpreting the respiratory exchange ratio (RER;  $\dot{V}_{CO_2}/\dot{V}_{O_2}$ ) in concert with the air convection requirement provides an indication of organismal acid-base balance. Although we cannot account for gas exchange partitioning between lungs and the skin, rates of total O<sub>2</sub> consumption, total CO<sub>2</sub> production, and ventilation influence acid-base balance (Jackson and Braun, 1979; Wang et al., 1998). Given that RER,  $\dot{V}_E/\dot{V}_{O_2}$ , and  $\dot{V}_E/\dot{V}_{CO_2}$  were the same in each temperature-acclimation group (Fig. 2 C, D, & E), the most parsimonious explanation for the combination of results we obtained is that ventilation matched metabolism and, presumably, contributed to maintenance of similar acid-base balance at rest. If we had found a lower ACR with similar RER or a similar ACR with a lower/ higher RER in cold-acclimated vs. control bullfrogs, we would have interpreted our results differently to include the potential for changes in resting cutaneous gas exchange,

intracardiac shunt, or acid-base balance, but this did not occur. Thus we conclude that breathing matches metabolism and probably contributes to maintenance of acid-base balance at rest in bullfrogs after 6-9 weeks of disuse in the aquatic overwintering environment shortly after forced transition to land and elevated temperature.

### *Sensitivity to Environmental Hypercarbia*

We reasoned that ventilation may sufficiently satisfy resting metabolism after simulated overwintering, but the respiratory control system may have a limited capacity to respond with increases in ventilation during perturbations to blood gas homeostasis. Hypercarbia and hypoxia increase ventilation via distinct mechanisms by predominately elevating breathing frequency and tidal volume, respectively, in adult bullfrogs (Santin and Hartzler, 2016). Therefore, we assessed the ventilatory responses to hypercarbia and hypoxia after the transition from cold-aquatic to warm-terrestrial environments.

Consistent with previous reports (Kinkead and Milsom, 1996; Santin and Hartzler, 2016), we showed here that ventilation did not increase significantly in any acclimation group at any time point during hypercarbia. Warm-acclimated bullfrogs in our study, however, underwent a large “post-hypercarbic hyperpnea” immediately after the exchange of room air for hypercarbia. Because the ventilatory response during exposure to environmental hypercarbia is under strong (Kinkead and Milsom, 1996) and presumably variable (Santin and Hartzler, 2016) inhibition by olfactory chemoreceptors, the post-hypercarbic hyperpnea has been suggested to better reflect stimulatory chemosensitivity associated with activation of central and peripheral chemoreceptors (Milsom et al., 2004; Santin and Hartzler, 2016). In cold-

acclimated bullfrogs, the post-hypercarbic hyperpnea was reduced by ~50% compared to control bullfrogs (Fig. 3A). Relative to baseline ventilation in normocarbia, cold-acclimated bullfrogs did not undergo significant increases in ventilation immediately following hypercarbia (Fig. 3A&B). The reduction in the ventilatory response following CO<sub>2</sub> washout did not occur on a background of a different metabolic response to CO<sub>2</sub> (Fig. 4), strongly suggesting that bullfrogs from overwintering environments underwent a reduction in CO<sub>2</sub> chemosensitivity *per se*. As hypercarbia/post-hypercarbia minimally influences the tidal volume in bullfrogs, a limited breathing frequency response underlies reduction in post-hypercarbic ventilation (Fig. 3C). Bullfrogs and other anurans contain an inherently episodic breathing pattern; specifically, breaths occur in clustered episodes, rather than a regular pattern (Kinkead and Milsom, 1994; Smatresk and Smits, 1991). Under the experimental conditions of the present study, breathing frequency increases during the post-hypercarbic period of control bullfrogs resulted from adding breaths to each episode and shortening the duration of the non-ventilatory period (Fig. 5). Our findings suggest that overwintering conditions lead to an inability to add breaths to episodes and shorten the duration of the non-ventilatory period. In anurans, ~80% of the stimulatory CO<sub>2</sub> chemosensitivity arises from the brainstem (near the 4<sup>th</sup> ventricle) and ~20% from peripheral chemoreceptors (or chemoreceptors outside the 4<sup>th</sup> ventricle) (Branco et al., 1993). Interestingly, our results showing blunted ventilatory responses to CO<sub>2</sub> challenge are consistent with preliminary evidence that overwintering submergence leads to a reduction in CO<sub>2</sub> chemosensitivity of locus coeruleus neurons (Santin, 2015; Santin and Hartzler, 2015) that drive ventilation during local brain and arterial acidemia (Noronha-de-Souza et al., 2006). This implies that overwintered bullfrogs have a disrupted CO<sub>2</sub>/pH chemosensory system.



However, the instantaneous frequency was reduced in cold-acclimated frogs (Fig. 5C) suggesting that issues associated with respiratory rhythmogenesis may, in part, account for lower ventilatory responses to CO<sub>2</sub> challenge independent of modulating chemosensitivity *per se*. Future work should be directed toward understanding the mechanisms underlying reduced ventilatory responses to elevated inspired CO<sub>2</sub> in cold-acclimated bullfrogs (*i.e.*, central vs. peripheral changes in chemosensitivity vs. rhythmogenic dysfunction).

Although cutaneous gas exchange eliminates a large proportion of metabolically produced CO<sub>2</sub> in anurans, acid-base regulation requires lung ventilation in bullfrogs (Gottlieb and Jackson, 1976). The CO<sub>2</sub> chemosensory system controls ventilation to regulate arterial P<sub>CO<sub>2</sub></sub> and pH in response to blood gas disturbances in air-breathing vertebrates (da Silva et al., 2013; Guyenet and Bayliss, 2015). Our results showing that overwintering conditions lead to a reduction in ventilatory responses to CO<sub>2</sub> challenge when assessed at warmer temperatures soon after emergence imply that there may be reduced capacity for compensation of acid-base disturbances by chemosensory-driven lung ventilation. During forced diving, bullfrogs also accumulate CO<sub>2</sub> (11 to 18 mm Hg), leading to acidemia (pH 7.9 to 7.6), after ~10 minutes at 25°C (Lillo, 1978). Furthermore, dive time in turtles inversely correlates with respiratory gas chemosensitivity (Reyes and Milsom, 2009). Since prolonged dives represent a behavioral mechanism for predator avoidance in ranid frogs (Gregory, 1979; Heatwole, 1961; McIntyre and McCollum, 2000), a reduced ability for CO<sub>2</sub>/pH to facilitate the occurrence of breaths at warmer temperatures after overwintering may confer the advantage of longer dive time to avoid additional aerial and terrestrial predators of the spring. However, the consequences of reduced ventilatory sensitivity to CO<sub>2</sub> in the early-spring

environment suggested here are speculative and require further study to place our results in an ecological context.

### *Sensitivity to Hypoxia*

In contrast to reduced ventilatory responses to hypercarbia, warm and cold-acclimated bullfrogs had similar ventilatory responses, air convection requirements, and breathing patterns in response to hypoxia (5% O<sub>2</sub>) at 24°C (Fig. 6, 7, 8). In this study, an augmentation of tidal volume mediated the ventilatory increase in response to hypoxia that occurred in each acclimation group (Fig. 6). O<sub>2</sub>-sensitive processes that drive ventilation located in the carotid labyrinth and the aortic arch effect ventilatory increases during hypoxia in anurans (Van Vliet and West, 1992). Additionally, a centrally-driven, hypoxic ventilatory depression occurs in adult bullfrogs, presumably to dampen breathing frequency during hypoxia for energy conservation (Fournier et al., 2007; Winmill et al., 2005). Similar to resting breathing, our findings suggest that overwintering conditions would not affect “early spring” function of O<sub>2</sub> sensitive processes mediating ventilatory responses to hypoxia. However, it is important to acknowledge that our measurements do not allow for speculation about changes in ventilation-perfusion matching and regulation of blood gases by alterations in right-to-left cardiac shunting that occur in anuran amphibians during hypoxia (Gamperl et al., 1999). Although we measured similar ventilated volumes of gas and rates of O<sub>2</sub> consumption before and during hypoxia among acclimation groups (Fig. 7), altered cardiac shunt patterns could lead to drastically different Pao<sub>2</sub> values even with identical ventilation and metabolism (Wang and Hicks, 1996; Wang et al., 1997). Therefore, similar hypoxic ventilatory responses could potentially be a result of varied O<sub>2</sub> chemosensitivities if differences in cardiac

shunts produced different changes in blood gases among temperature acclimation groups during hypoxia. Regardless of the mechanistic causes and effects emanating from differences in sensory processing or system integration, our findings demonstrate that recently emerged frogs possess ventilatory sensitivity to hypoxia, but blunted sensitivity to CO<sub>2</sub> in response to constant stimuli supplied in the ambient environment following overwintering conditions.

### *Perspectives and Significance*

Following long-term depression of lung breathing and chemosensory respiratory drive during cold submergence, bullfrogs breathed normally at rest and possessed normal ventilatory sensitivity to oxygen shortage, but had reduced ventilatory responses to CO<sub>2</sub> challenge after transition to land at a warmer temperature. This is an intriguing scenario because prolonged inactivity generally results in loss of function through muscle atrophy or neuroplastic deficits (Clark et al., 2006; Phillips and McGlory, 2014), unless evaded through physiological/ behavioral compensatory mechanisms. For example, hibernators employ a suite of unique cellular mechanisms to avoid muscle atrophy (Lee et al., 2008; Lin et al., 2012; Nowell et al., 2011; Tessier and Storey, 2014; Van Breukelen and Martin, 2002; Young et al., 2013) and can even experience muscle hypertrophy (Reid et al., 1995). However, some rodent hibernators may also experience skeletal muscle atrophy that should hinder performance (Wickler et al., 1987; Wickler et al., 1991). From the neural perspective, a wealth of information exists regarding how neurons and circuits maintain target levels of activity despite removing or enhancing activity inputs (termed homeostatic plasticity). However, models to study these processes use pharmacological or pathological paradigms to manipulate neuronal activity *in vivo*

and *in vitro* primarily at early developmental stages (Hengen et al., 2013; Knogler et al., 2010; Ngodup et al., 2015; Schacher and Hu, 2014; Turrigiano, 2012; Wilhelm and Wenner, 2008). Thus, the bullfrog respiratory control system following overwintering offers a powerful ability to uncover mechanisms leading to and resulting in preservation of (respiratory motor output and hypoxia sensitivity) and deterioration (CO<sub>2</sub> sensitivity) of sensorimotor function in the same species, individual, and neural control system after ecologically relevant inactivity.

### *Conclusion*

We performed these experiments to determine whether aspects of the respiratory control system were functional following inactivity in the overwintering period. We found that bullfrogs breathed sufficiently to satisfy a greater metabolic rate associated with warmer temperatures soon after forced emergence. We also showed that cold-acclimated bullfrogs had preserved ventilatory responses to oxygen lack, but not elevated CO<sub>2</sub>. The ability to dissect mechanisms underlying preservation and loss of sensorimotor function following prolonged disuse in this natural context may provide a powerful model to improve the basic understanding of consequences following inactivity in other normal or pathological states.

**Acknowledgments:** We would like thank Robert W. Putnam for useful discussions and three anonymous reviewers for comments on the contents of this manuscript.

**Competing Interests:** The authors declare no competing or financial interests.

**Author Contributions:** J.S. & L.H. conception and design of research; J.S. performed experiments; J.S. analyzed data; J.S. & L.H. interpreted results; J.S. wrote the manuscript; J.S. & L.K. revised, edited, and approved the final version of the manuscript.

**Funding:** This works was supported by a National Science Foundation grant (NSF IOS-1257338) (LH) and the Biomedical Sciences PhD program at Wright State University (JS).

## References

- Bicego-Nahas, K. and Branco, L.** (1999). Seasonal changes in the cardiorespiratory responses to hypercarbia and temperature in the bullfrog, *Rana catesbeiana*. *Comp.Biochem. Physiol.- A Mol. Int. Physiol.* **124**, 221.
- Bícego-Nahas, K. C., Gargaglioni, L. H. and Branco, L. G. S.** (2001). Seasonal changes in the preferred body temperature, cardiovascular, and respiratory responses to hypoxia in the toad, *Bufo paracnemis*. *J. Exp. Zool.* **289**, 359-365.
- Branco, L. G. S., Glass, M. L., Wang, T. and Hoffmann, A.** (1993). Temperature and central chemoreceptor drive to ventilation in toad *Bufo paracnemis*. *Respir. Physiol.* **93**, 337-346.
- Clark, B. C., Manini, T. M., Bolanowski, S. J. and Ploutz-Snyder, L. L.** (2006). Adaptations in human neuromuscular function following prolonged unweighting: II. Neurological properties and motor imagery efficacy. *J. Appl. Physiol.* **101**, 264-272.
- da Silva, G. S., Glass, M. L. and Branco, L. G.** (2013). Temperature and respiratory function in ectothermic vertebrates. *J. Therm. Biol.* 55-63.
- Donohoe, P. H., West, T. G. and Boutilier, R. G.** (1998). Respiratory, metabolic, and acid-base correlates of aerobic metabolic rate reduction in overwintering frogs. *Am. J. Physiol.- Reg. Int.Comp. Physiol.* **274**, R704-R710.
- Donohoe, P. H., West, T. G. and Boutilier, R. G.** (2000). Factors affecting membrane permeability and ionic homeostasis in the cold-submerged frog. *J. Exp.Biol.* **203**, 405-414.
- Emery, A. R., Berst, A. H. and Kodaira, K.** (1972). Under-ice observations of wintering sites of leopard frogs. *Copeia*, 123-126.
- Feder, M. E.** (1982). Environmental variability and thermal acclimation of metabolism in tropical anurans. *J. Therm. Biol.* **7**, 23-28.
- Feldman, J. L., Del Negro, C. A. and Gray, P. A.** (2013). Understanding the rhythm of breathing: so near yet so far. *Ann. Rev. Physiol.* **75**, 423.
- Fournier, S., Allard, M., Roussin, S. and Kinkead, R.** (2007). Developmental changes in central O<sub>2</sub> chemoreflex in *Rana catesbeiana*: the role of noradrenergic modulation. *J. Exp. Biol.* **210**, 3015-3026.
- Gamperl, A., Milsom, W., Farrell, A. and Wang, T.** (1999). Cardiorespiratory responses of the toad (*Bufo marinus*) to hypoxia at two different temperatures. *J. Exp.Biol.* **202**, 3647-3658.
- Glass, M. L., Wood, S. C. and Johansen, K.** (1978). The application of pneumotachography on small unrestrained animals. *Comp.Biochem. Physiol.- A Mol. Int. Physiol.* **59**, 425-427.
- Gottlieb, G. and Jackson, D. C.** (1976). Importance of pulmonary ventilation in respiratory control in the bullfrog. *Am. J. Physiol.* **230**, 608-613.
- Gregory, P. T.** (1979). Predator avoidance behavior of the red-legged frog (*Rana aurora*). *Herpetologica*, 175-184.
- Guyenet, P. G. and Bayliss, D. A.** (2015). Neural Control of Breathing and CO<sub>2</sub> Homeostasis. *Neuron* **87**, 946-961.
- Heatwole, H.** (1961). Habitat selection and activity of the wood frog, *Rana sylvatica* Le Conte. *Am. Mid. Nat.*, 301-313.
- Hengen, K. B., Lambo, M. E., Van Hooser, S. D., Katz, D. B. and Turrigiano, G. G.** (2013). Firing rate homeostasis in visual cortex of freely behaving rodents. *Neuron* **80**, 335-342.

**Hudson, N. J. and Franklin, C. E.** (2002). Maintaining muscle mass during extended disuse: aestivating frogs as a model species. *J. Exp. Biol.* **205**, 2297-2303.

**Jackson, D. C. and Braun, B. A.** (1979). Respiratory control in bullfrogs: cutaneous versus pulmonary response to selective CO<sub>2</sub> exposure. *J. Comp. Neurol.* **129**, 339-342.

**Jones, R. M.** (1982). How toads breathe: control of air flow to and from the lungs by the nares in *Bufo marinus*. *Respir. Physiol.* **49**, 251-265.

**Kinkead, R.** (2009). Phylogenetic trends in respiratory rhythmogenesis: insights from ectothermic vertebrates. *Respir. Physiol. Neurobiol.* **168**, 39-48.

**Kinkead, R. and Milsom, W.** (1996). CO<sub>2</sub>-sensitive olfactory and pulmonary receptor modulation of episodic breathing in bullfrogs. *Am. J. Physiol.-Reg., Int. Comp. Physiol.* **270**, R134-R144.

**Kinkead, R. and Milsom, W. K.** (1994). Chemoreceptors and control of episodic breathing in the bullfrog *Rana catesbeiana*. *Respir. Physiol.* **95**, 81-98.

**Knogler, L. D., Liao, M. and Drapeau, P.** (2010). Synaptic scaling and the development of a motor network. *J. Neurosci.* **30**, 8871-8881.

**Langlet, C., Bastide, B. and Canu, M.-H.** (2012). Hindlimb unloading affects cortical motor maps and decreases corticospinal excitability. *Exp. Neurol.* **237**, 211-217.

**Lee, K., Park, J. Y., Yoo, W., Gwag, T., Lee, J. W., Byun, M. W. and Choi, I.** (2008). Overcoming muscle atrophy in a hibernating mammal despite prolonged disuse in dormancy: proteomic and molecular assessment. *J. Cell. Biochem.* **104**, 642-656.

**Lillo, R. S.** (1978). The Effect of Arterial-Blood PO<sub>2</sub>, PCO<sub>2</sub>, and pH on Diving Bradycardia in the Bullfrog *Rana catesbeiana*. *Physiol. Zool.* **51**, 340-346.

**Lillo, R. S.** (1980). Heart rate and blood pressure in bullfrogs during prolonged maintenance in water at low temperature. *Comp. Biochem. Physiol.- A Physiol.* **65**, 251-253.

**Lin, D. C., Hershey, J. D., Mattoon, J. S. and Robbins, C. T.** (2012). Skeletal muscles of hibernating brown bears are unusually resistant to effects of denervation. *J. Exp. Biol.* **215**, 2081-2087.

**Mackenzie, J. A. and Jackson, D. C.** (1978). The effect of temperature on cutaneous CO<sub>2</sub> loss and conductance in the bullfrog. *Respir. Physiol.* **32**, 313-323.

**McIntyre, P. B. and McCollum, S. A.** (2000). Responses of bullfrog tadpoles to hypoxia and predators. *Oecologia* **125**, 301-308.

**Millesi, E., Prossinger, H., Dittami, J. P. and Fieder, M.** (2001). Hibernation effects on memory in European ground squirrels (*Spermophilus citellus*). *J. Biol. Rhy.* **16**, 264-271.

**Milsom, W. K., Abe, A. S., Andradeb, D. V. and Tattersall, G. J.** (2004). Evolutionary trends in airway CO<sub>2</sub>/H<sup>+</sup> chemoreception. *Respir. Physiol. Neurobiol.* **144**, 191-202.

**Mitra, A., Mitra, S. S. and Tsien, R. W.** (2012). Heterogeneous reallocation of presynaptic efficacy in recurrent excitatory circuits adapting to inactivity. *Nat. Neurosci.* **15**, 250-257.

**Morales, R. D. and Hedrick, M. S.** (2002). Temperature and pH/CO<sub>2</sub> modulate respiratory activity in the isolated brainstem of the bullfrog *Rana catesbeiana*. *Comp. Biochem. Physiol.- A Mol. Int. Physiol.* **132**, 477-487.

**Ngodup, T., Goetz, J. A., McGuire, B. C., Sun, W., Lauer, A. M. and Xu-Friedman, M. A.** (2015). Activity-dependent, homeostatic regulation of neurotransmitter release from auditory nerve fibers. *PNAS.* **112**, 6479-6484.



**Noronha-de-Souza, C. R., Bicego, K. C., Michel, G., Glass, M. L., Branco, L. G. and Gargaglioni, L. H.** (2006). Locus coeruleus is a central chemoreceptive site in toads. *Am. J. Physiol.-Reg., Int. Comp. Physiol.* **291**, R997-R1006.

**Nowell, M. M., Choi, H. and Rourke, B. C.** (2011). Muscle plasticity in hibernating ground squirrels (*Spermophilus lateralis*) is induced by seasonal, but not low-temperature, mechanisms. *J. Comp. Physiol. B* **181**, 147-164.

**Phillips, S. M. and McGlory, C.** (2014). CrossTalk proposal: The dominant mechanism causing disuse muscle atrophy is decreased protein synthesis. *J. Physiol.* **592**, 5341-5343.

**Powers, S. K., Shanely, R. A., Coombes, J. S., Koesterer, T. J., McKenzie, M., Van Gammeren, D., Cicale, M. and Dodd, S. L.** (2002). Mechanical ventilation results in progressive contractile dysfunction in the diaphragm. *J. Appl. Physiol.* **92**, 1851-1858.

**Reid, W. D., Ng, A., Wilton, R. K. and Milsom, W. K.** (1995). Characteristics of diaphragm muscle fibre types in hibernating squirrels. *Respir. Physiol.* **101**, 301-309.

**Renaud, J. and Stevens, E.** (1983). The extent of long-term temperature compensation for jumping distance in the frog, *Rana pipiens*, and the toad, *Bufo americanus*. *Can. J. Zool.* **61**, 1284-1287.

**Reyes, C. and Milsom, W. K.** (2009). Daily and seasonal rhythms in the respiratory sensitivity of red-eared sliders (*Trachemys scripta elegans*). *J. Exp. Biol.* **212**, 3339-3348.

**Rocha, P. L. and Branco, L. G.** (1998). Seasonal changes in the cardiovascular, respiratory and metabolic responses to temperature and hypoxia in the bullfrog *Rana catesbeiana*. *J. Exp. Biol.* **201**, 761-768.

**Santin, J.** (2015). Cold-acclimation reduces CO<sub>2</sub>/pH chemosensitivity of locus coeruleus neurons in the American bullfrog, *Lithobates catesbeianus*. In *Proceedings of The Physiological Society: The Physiological Society*.

**Santin, J. and Hartzler, L.** (2015). Cold-acclimation reduces CO<sub>2</sub> sensitivity of chemosensory locus coeruleus neurons of American bullfrogs, *Lithobates catesbeianus*. *J. FASEB* **29**, 686.7.

**Santin, J. M. and Hartzler, L. K.** (2016). Reassessment of chemical control of breathing in undisturbed bullfrogs, *Lithobates catesbeianus*, using measurements of pulmonary ventilation. *Respir. Physiol. Neurobiol.* **224**, 80-89.

**Santin, J. M., Watters, K. C., Putnam, R. W. and Hartzler, L. K.** (2013). Temperature influences neuronal activity and CO<sub>2</sub>/pH sensitivity of locus coeruleus neurons in the bullfrog, *Lithobates catesbeianus*. *Am. J. Physiol.-Reg., Int. Comp. Physiol.* **305**, R1451-R1464.

**Schacher, S. and Hu, J.-Y.** (2014). The less things change, the more they are different: contributions of long-term synaptic plasticity and homeostasis to memory. *Learn. Mem.* **21**, 128-134.

**Smatresk, N. J. and Smits, A. W.** (1991). Effects of central and peripheral chemoreceptor stimulation on ventilation in the marine toad, *Bufo marinus*. *Respir. Physiol.* **83**, 223-238.

**St-Pierre, J., Brand, M. and Boutilier, R.** (2000). The effect of metabolic depression on proton leak rate in mitochondria from hibernating frogs. *J. Exp. Biol.* **203**, 1469-1476.

**Stinner, J., Zarlinga, N. and Orcutt, S.** (1994). Overwintering behavior of adult bullfrogs, *Rana catesbeiana*, in northeastern Ohio. *J. Oh. Sci.* **94**, 8-13.



- Tattersall, G. and Boutilier, R.** (1997). Balancing hypoxia and hypothermia in cold-submerged frogs. *J. Exp.Biol.* **200**, 1031-1038.
- Tattersall, G. J. and Boutilier, R. G.** (1999a). Constant set points for pH and PCO<sub>2</sub> in cold-submerged skin-breathing frogs. *Respir. Physiol.* **118**, 49-59.
- Tattersall, G. J. and Boutilier, R. G.** (1999b). Does behavioural hypothermia promote post-exercise recovery in cold-submerged frogs? *J. Exp.Biol.* **202**, 609-622.
- Tattersall, G. J. and Ultsch, G. R.** (2008). Physiological ecology of aquatic overwintering in ranid frogs. *Biol. Rev.* **83**, 119-140.
- Tessier, S. N. and Storey, K. B.** (2014). To be or not to be: the regulation of mRNA fate as a survival strategy during mammalian hibernation. *Cell Stress and Chaperones* **19**, 763-776.
- Turrigiano, G.** (2012). Homeostatic synaptic plasticity: local and global mechanisms for stabilizing neuronal function. *Cold Spring Harbor perspectives in biology* **4**, a005736.
- Ultsch, G. R., Reese, S. A. and Stewart, E.** (2004). Physiology of hibernation in *Rana pipiens*: metabolic rate, critical oxygen tension, and the effects of hypoxia on several plasma variables. *J. Exp. Zool. A: Comp. Exp. Biol.* **301**, 169-176.
- Van Breukelen, F. and Martin, S. L.** (2002). Invited review: molecular adaptations in mammalian hibernators: unique adaptations or generalized responses? *J. App. Physiol.* **92**, 2640-2647.
- Van Vliet, B. N. and West, N. H.** (1992). Functional characteristics of arterial chemoreceptors in an amphibian *Bufo marinus*. *Respir. Physiol.* **88**, 113-127.
- Vitalis, T. Z. and Shelton, G.** (1990). Breathing in *Rana pipiens*: the mechanism of ventilation. *J. Exp.Biol.* **154**, 537-556.
- Wang, T., Abe, A. and Glass, M.** (1998). Temperature effects on lung and blood gases in *Bufo paracnemis*: consequences of bimodal gas exchange. *Respir. Physiol.* **113**, 231-238.
- Wang, T. and Hicks, J. W.** (1996). The interaction of pulmonary ventilation and the right-left shunt on arterial oxygen levels. *J. Exp.Biol.* **199**, 2121-2129.
- Wang, T., Krosniunasl, E. H. and Hicks, J. W.** (1997). The role of cardiac shunts in the regulation of arterial blood gases. *Am. Zool.* **37**, 12-22.
- West, T., Donohoe, P., Staples, J. and Askew, G.** (2006). Tribute to RG Boutilier: The role for skeletal muscle in the hypoxia-induced hypometabolic responses of submerged frogs. *J. Exp.Biol.* **209**, 1159-1168.
- Wickler, S. J., Horwitz, B. A. and Kott, K. S.** (1987). Muscle function in hibernating hamsters: a natural analog to bed rest? *J. Therm. Biol.* **12**, 163-166.
- Wickler, S. J., Hoyt, D. F. and van Breukelen, F.** (1991). Disuse atrophy in the hibernating golden-mantled ground squirrel, *Spermophilus lateralis*. *Am. J. Physiol.-Reg., Int. Comp. Physiol.* **261**, R1214-R1217.
- Wilhelm, J. C. and Wenner, P.** (2008). GABAA transmission is a critical step in the process of triggering homeostatic increases in quantal amplitude. *PNAS* **105**, 11412-11417.
- Willis, Y. L., Moyle, D. L. and Baskett, T. S.** (1956). Emergence, breeding, hibernation, movements and transformation of the bullfrog, *Rana catesbeiana*, in Missouri. *Copeia*, 30-41.
- Winmill, R. E., Chen, A. K. and Hedrick, M. S.** (2005). Development of the respiratory response to hypoxia in the isolated brainstem of the bullfrog *Rana catesbeiana*. *J. Exp.Biol.* **208**, 213-222.

**Young, K. M., Cramp, R. L. and Franklin, C. E.** (2013). Each to their own: skeletal muscles of different function use different biochemical strategies during aestivation at high temperature. *J. Exp.Biol.* **216**, 1012-1024.

## Figures

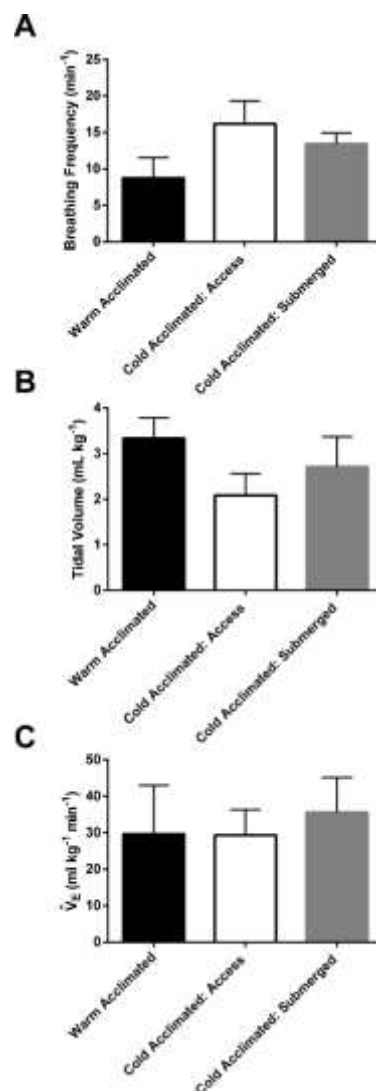

**Figure 1 Cold-acclimation with and without access to air does not affect resting ventilatory parameters.** Breathing frequency (A), tidal volume (B), and minute ventilation ( $\dot{V}_E$ ; C) measured at 24°C were not different (one-way ANOVA;  $p > 0.05$  for each parameter) among warm and groups of cold-acclimated bullfrogs. Black, white, and gray bars represent mean control ( $n=8$ ; black bars), cold-acclimated with air ( $n=7$ ; white bars), and cold-acclimated with no air ( $n=5$ ; gray bars), respectively. Error bars represent  $\pm$  SEM.

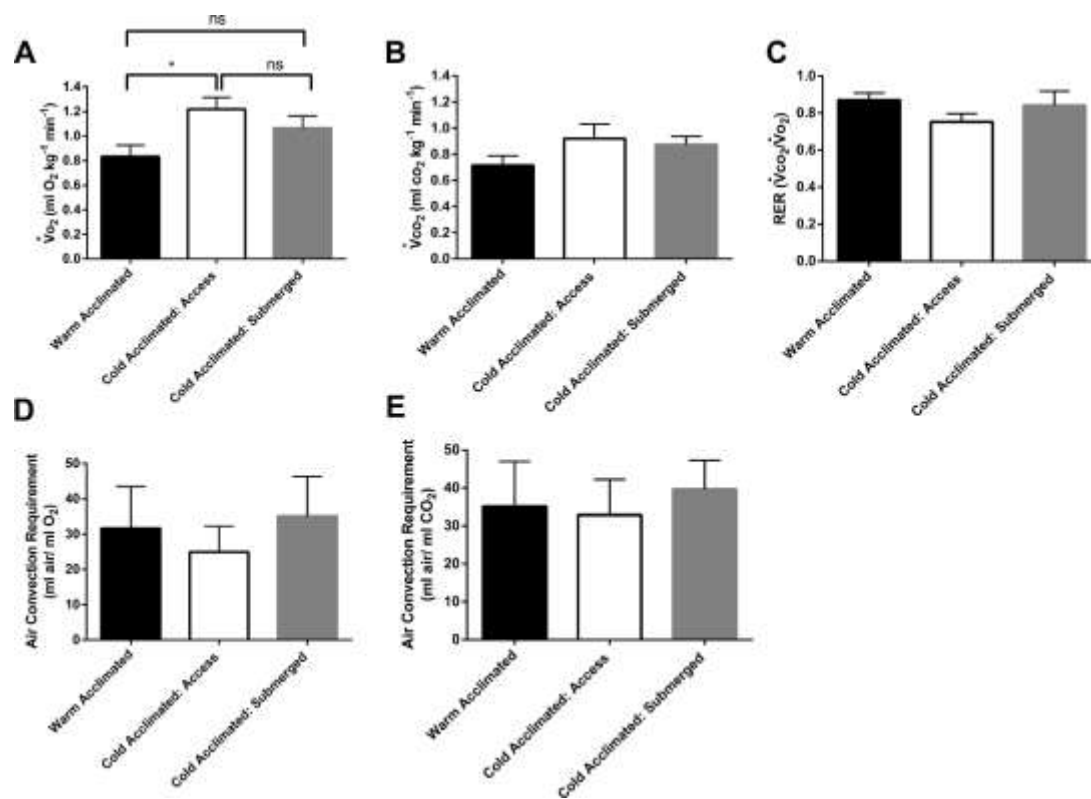

**Figure 2 Bullfrogs ventilate sufficiently to support increased metabolic rate ( $\dot{V}O_2$ ) after overwintering.** A-C shows mean rate of  $O_2$  consumption ( $\dot{V}O_2$ ; A), rate of  $CO_2$  production ( $\dot{V}CO_2$ ; B), and respiratory exchange ratio (RER; C) in warm-acclimated (black bars;  $n=8$ ), cold-acclimated with air (white bars;  $n=7$ ), and cold-submerged (gray bars;  $n=6$ ) bullfrogs. As shown in A.,  $\dot{V}O_2$  was influenced by temperature acclimation (one-way ANOVA;  $p=0.0274$ ;  $F_{(2,18)}= 4.404$ ). Cold-acclimation with access to air resulted in elevated  $\dot{V}O_2$  compared to control (Holm-Sidak multiple comparisons test;  $p<0.05$ ), but not compared to cold-submerged frogs (Holm-Sidak multiple comparisons test;  $p>0.05$ ) at  $24^\circ C$ . In contrast, cold-submerged frogs did not have  $O_2$  consumption greater than control or cold-acclimated frogs with air access (Holm-Sidak multiple comparisons test;  $p>0.05$ ).

Although  $\dot{V}_{CO_2}$  showed a similar trend as  $\dot{V}_{O_2}$ ,  $\dot{V}_{CO_2}$  (B; one-way ANOVA;  $p > 0.05$ ;  $F_{(2,18)} = 1.6099$ ) and RER (C; one-way ANOVA;  $p = 0.26$ ;  $F_{(2,18)} = 1.448$ ) was unaffected by temperature acclimation. D and E show air convection requirements for  $O_2$  ( $\dot{V}_E / \dot{V}_{O_2}$ ) and  $CO_2$  ( $\dot{V}_E / \dot{V}_{CO_2}$ ), respectively. On an animal to animal basis, cold-acclimated bullfrogs with access ( $n = 7$ ) to air and submerged ( $n = 5$ ) breathed sufficiently to match metabolic demands as indicated by statistically indistinguishable air convection requirements for  $O_2$  (D; one-way ANOVA;  $p = 0.8039$ ;  $F_{(2,18)} = 0.2211$ ) and  $CO_2$  (E; one-way ANOVA;  $p = 0.9128$ ;  $F_{(2,18)} = 0.0917$ ) compared to control ( $n = 8$ ). Thus frogs removed from conditions that mimic overwintering conditions with and without access to air do not hyper- or hypoventilate compared to control bullfrogs. Error bars represent  $\pm$  SEM. \* $p < 0.05$ , ns = not significant

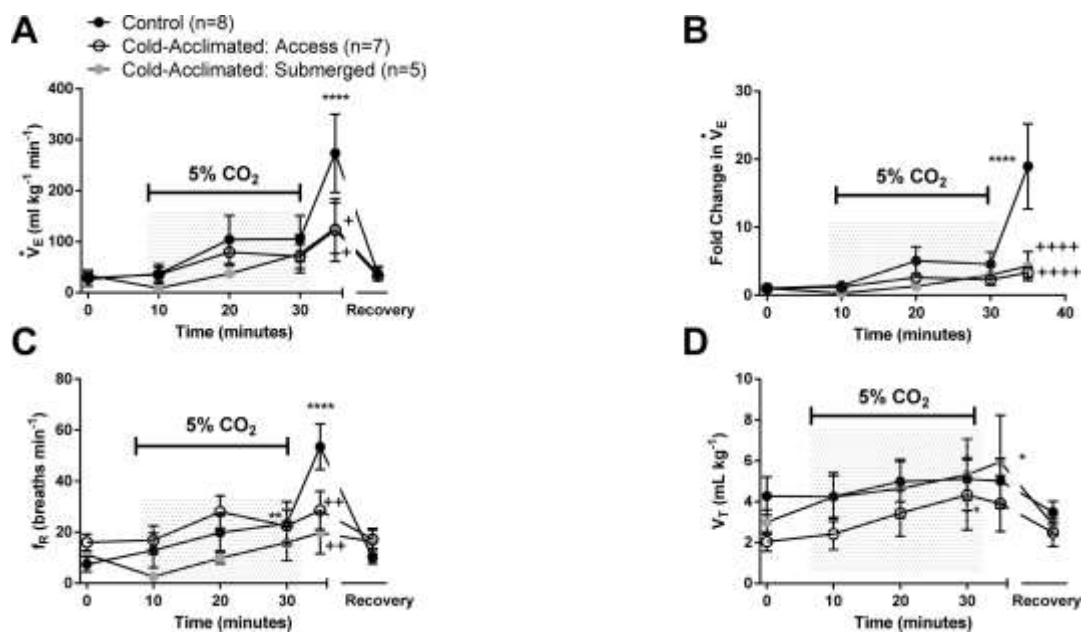

**Figure 3 Cold-acclimation with and without air leads to a reduction in the post-hypercarbic hyperpnea, but not differences in ventilation during CO<sub>2</sub> exposure.**

A-D shows absolute  $\dot{V}_E$ ,  $\dot{V}_E$  relative to baseline in normocarbica, breathing frequency, and tidal volume, respectively, in warm-acclimated (black circles; n=8), cold-acclimated with air (white circles; n=7), and cold-submerged (gray circles; n=5) bullfrogs. A. (two-way ANOVA; CO<sub>2</sub> effect;  $F_{(4,68)} = 12.31$ ;  $p < 0.0001$ ) and B (CO<sub>2</sub> x temperature acclimation interaction;  $F_{(8,64)} = 3.202$ ;  $p = 0.0038$ ) shows that hypercarbia does not lead to statistically significant increases in  $\dot{V}_E$  in all three groups (Holm-Sidak multiple comparisons test;  $p > 0.05$ ); however, the post-hypercarbic ventilatory response is only significantly greater than normocarbica breathing in control frogs (Holm-Sidak multiple comparisons test;  $p < 0.0001$ ) and significantly blunted in both cold-acclimated groups compared to control frogs (Holm-Sidak multiple comparisons test;  $p < 0.05$ ). C. (two-way ANOVA; time x acclimation;  $F_{(8,64)} = 4.784$ ;  $p < 0.001$ )

shows that the decreased post-hypercarbic hyperpnea in cold-acclimated frogs occurs due to smaller increases in breathing frequency (Holm-Sidak's multiple comparisons test;  $p < 0.001$ ). Tidal volume (D) only increased in response to hypercarbia or post hypercarbic stimulation in the cold-acclimated groups; however, this was not enough to compensate for reduced frequency responses to increase  $\dot{V}_E$ . Error bars represent  $\pm$  SEM. \* $p < 0.05$ , \*\* $p < 0.01$ , \*\*\*\* $p < 0.0001$  compared to normocarbic control (within animal comparisons). + $p < 0.05$ , ++ $p < 0.01$ , +++ $p < 0.0001$  compared to control frog (between animal comparisons)

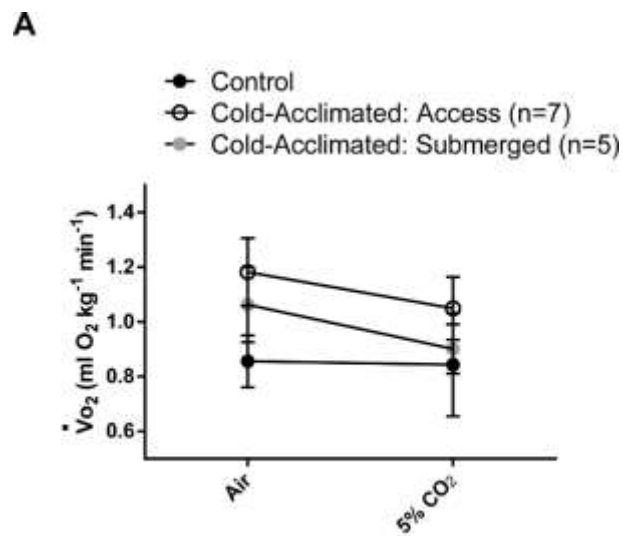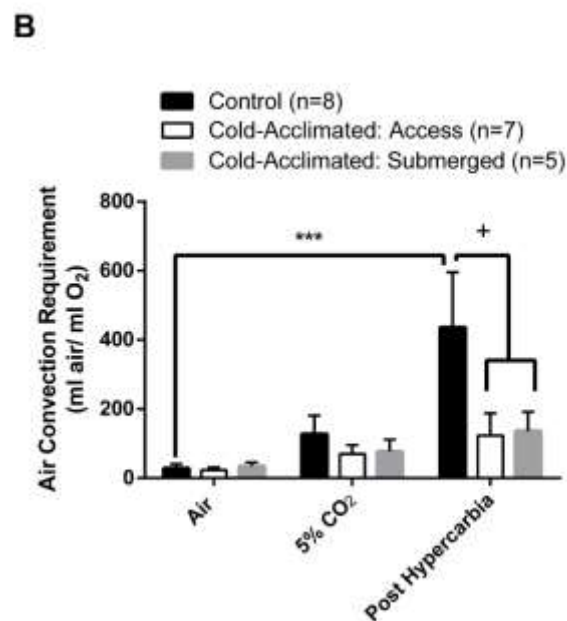

**Figure 4 Cold-acclimated bullfrogs do not increase ventilation relative to metabolism in response to or immediately after hypercarbia.**

A. shows that mean  $\dot{V}O_2$  is not affected by environmental hypercarbia in warm-acclimated (black circles; n=8), cold-acclimated with air (white circles; n=7), and cold-submerged (gray circles; n=5) bullfrogs (two-way ANOVA;  $p > 0.05$  for main



effects and interaction). B. presents mean air convection requirements (ACR;  $\dot{V}_E/\dot{V}_{O_2}$ ) before, during and after hypercarbia. ACR of warm-acclimated bullfrogs increased in the post-hypercarbic period compared to rest in normocarbia ( $p < 0.001$ ; Holm-Sidak's multiple comparisons test) and was greater during post hypercarbia compared to both groups of cold-acclimated bullfrogs ( $p < 0.05$ ; Holm-Sidak's multiple comparisons test). Error bars represent  $\pm$  SEM. \*\*\* $p < 0.001$  compared to control value in normocarbia (within animal differences). + $p < 0.05$  compared to control bullfrogs during post-hypercarbic hyperpnea (between animal differences).

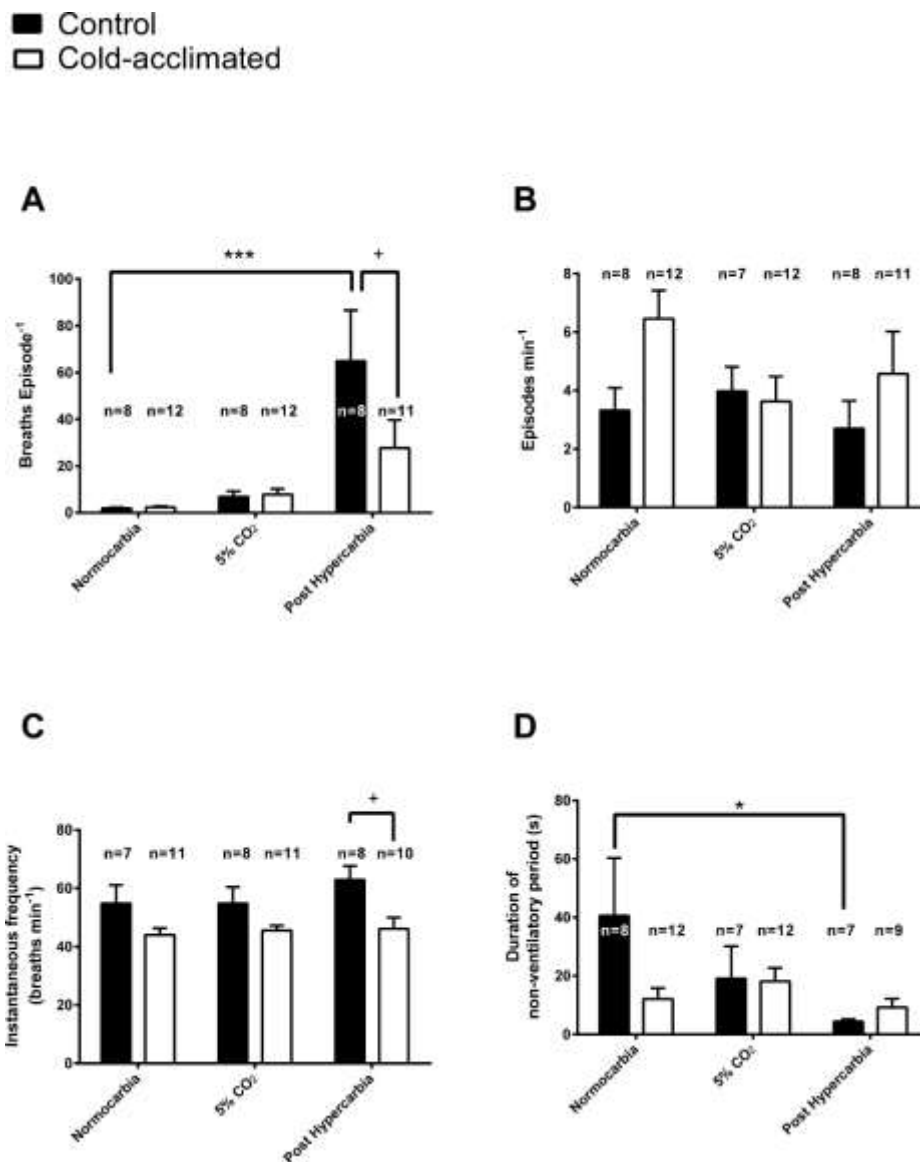

**Figure 5 Cold-acclimated bullfrogs do not undergo changes in breathing pattern that lead to increases in absolute respiratory frequency during post-hypercarbia.** A-D shows breathing pattern parameters including breaths episode<sup>-1</sup> (A), episodes min<sup>-1</sup> (B), instantaneous breathing frequency (C), and duration of the non-ventilatory period (D) in warm (black bars) and cold-acclimated (white bars) bullfrogs. Sample sizes are included in the figure. Reduced breathing frequency

responses during post hypercarbia of cold-acclimated bullfrogs manifests due to a reduction in the number of breaths added to each breathing episode (A;  $p < 0.05$ ; warm vs. cold-acclimated; Holm-Sidak's multiple comparisons test,  $p < 0.0001$ ; normocarbica vs. post-hypercarbia in warm-acclimated bullfrogs; Holm-Sidak's multiple comparisons test) without changing the total number of episodes (B.,  $p > 0.05$  for all comparisons; Holm-Sidak's multiple comparisons test). C. shows that instantaneous frequency (*i.e.*, the breathing frequency during breathing episodes) is decreased in cold-acclimated bullfrogs during the post-hypercarbic period compared to warm acclimated bullfrogs ( $p < 0.05$ ; warm vs. cold-acclimated during post-hypercarbia; Holm-Sidak's multiple comparisons test). Lastly, D. indicates that warm-acclimated bullfrogs decrease the duration of the non-ventilatory period during hypercarbia ( $p < 0.05$ ; normocarbica vs. post-hypercarbia for warm-acclimated bullfrogs; Holm-Sidak's multiple comparisons test), but cold-acclimated bullfrogs do not ( $p > 0.05$  for all comparisons relative to normocarbica). Error bars represent  $\pm$  SEM. \* $p < 0.05$ , \*\*\* $p < 0.001$  compared to normoxia for each acclimation group and + $p < 0.05$  compared to warm-acclimated bullfrogs (between animal differences).

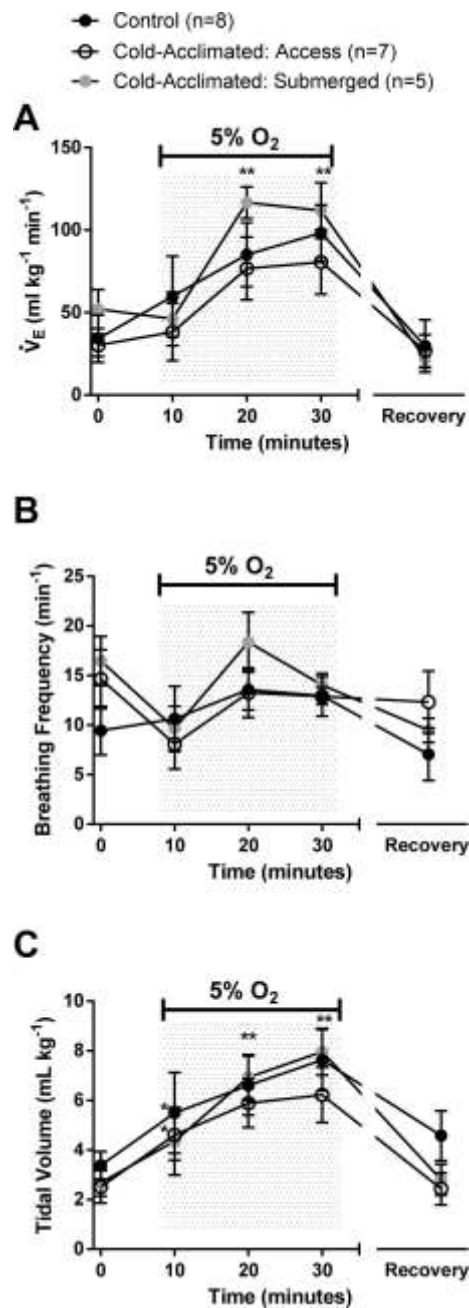

**Figure 6 Cold-acclimation with and without access to air does not influence ventilatory response to acute hypoxia.** A-C shows absolute  $\dot{V}_E$ , breathing frequency, and tidal volume, respectively, during exposure to hypoxia (5% O<sub>2</sub>) in warm-acclimated (black circles; n=8), cold-acclimated with air (white circles; n=7),

and cold-submerged (gray circles; n=5) bullfrogs. Asterisks placed above all acclimation groups at specific time points in hypoxia indicates the same significance level achieved for each group. All temperature acclimation groups increased  $\dot{V}_E$  compared to baseline (two-way ANOVA; effect of time in hypoxia;  $F_{(3,51)}= 25.42$ ;  $p<0.0001$ ) in response to hypoxia due to increases in tidal volume (two-way ANOVA; effect of time in hypoxia;  $F_{(3,51)}= 21.75$ ;  $p<0.0001$ ). There was no time in hypoxia x acclimation interactions or significant *post hoc* comparisons existed between acclimation groups at any time point (two-way ANOVA with Holm-Sidak multiple comparisons test;  $p>0.05$  for all). Although there was an effect of hypoxia on breathing frequency (two-way ANOVA; effect of time in hypoxia;  $F_{(3,51)}= 4.099$ ;  $p=0.0111$ ), there were no statistically significant pairwise comparisons between different time points in hypoxia. Error bars represent  $\pm$  SEM. \* $p<0.05$ , \*\* $p<0.01$  compared to normoxia for each acclimation group.

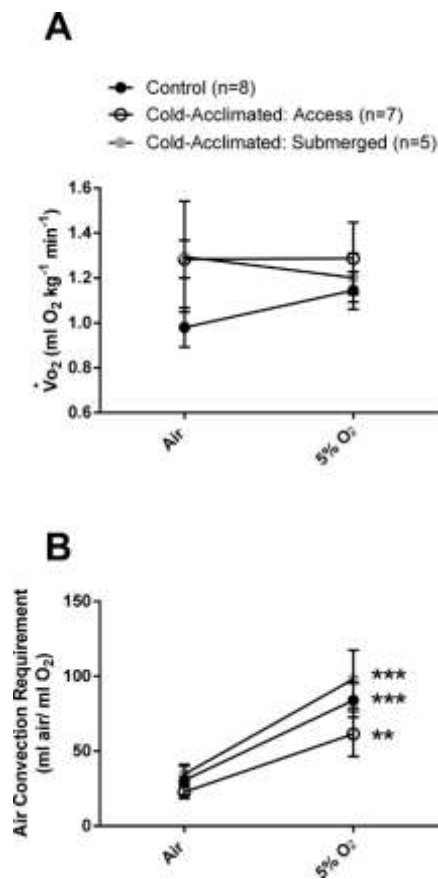

**Figure 7 Metabolic responses and hyperventilation during hypoxia do not differ between acclimation groups.** A. shows O<sub>2</sub> consumption ( $\dot{V}O_2$ ; A) before and after 30 minutes of hypoxia (5% O<sub>2</sub>) in control (black circles; n=8), cold-acclimated with air access (white circles; n=7), and cold-submerged bullfrogs (gray circles; n=5). B. indicates that both groups of cold-acclimated bullfrogs underwent similar magnitude of hyperventilation in response to 30 minutes of hypoxia as calculated by the air convection requirement for O<sub>2</sub> (main effect of hypoxia; two-way ANOVA;  $F_{(1,17)}=68.27$ ;  $p<0.0001$ ; significant *post hoc* analysis for each acclimation group). Error bars represent  $\pm$  SEM. \*\* $p<0.01$ , \*\*\* $p<0.001$  compared to normoxic for each acclimation group.

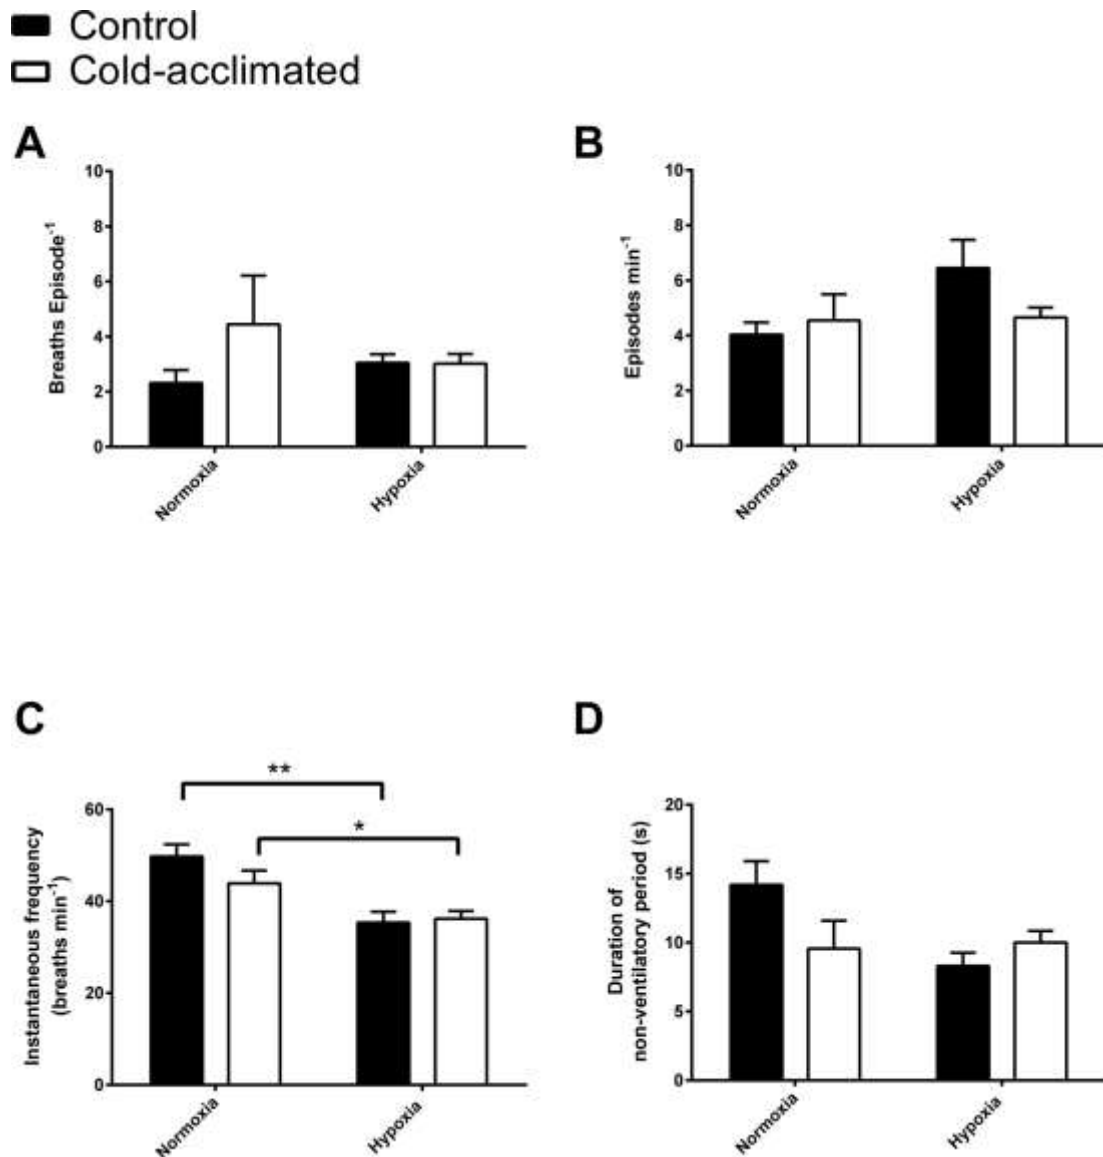

**Figure 8 Breathing pattern does not differ between warm and cold-acclimated bullfrogs in response to hypoxia.** A-D shows pooled breathing pattern parameters including breaths episode<sup>-1</sup> (control: n= 8, cold: n=12) (A), episodes min<sup>-1</sup> (control: n= 8, cold: n=12) (B), instantaneous breathing frequency (control: n= 8, cold: n=11) (C), and duration of the non-ventilatory period (control: n= 8, cold: n=12) (D) before and after hypoxia (5% O<sub>2</sub>) in warm (black bars) and pooled, cold-acclimated (white bars)

bullfrogs. Breaths episode<sup>-1</sup> (A), episodes min<sup>-1</sup> (B), and duration of the non-ventilatory period (D) were affected by hypoxia in both acclimation groups (two-way ANOVA;  $p > 0.05$ ). The instantaneous breathing frequency (C) decreased during hypoxia in both acclimation groups (main effect of hypoxia, but not acclimation; two-way ANOVA;  $p = 0.0007$ , warm-acclimated;  $p < 0.001$ ; Holm-Sidak's multiple comparisons test, cold-acclimated;  $p < 0.01$ ; Holm-Sidak's multiple comparisons test). Error bars represent  $\pm$  SEM. \*  $p < 0.05$ , \*\* $p < 0.01$
